# Supplementary material for: Ectopic Fat Depots and Coronary Artery Calcium in South Asians Compared With Other Racial/Ethnic Groups
Source: PubMed Central journal article supplement — J Am Heart Assoc. 2016 Nov 17;5(11):e004257. doi: 10.1161/JAHA.116.004257 (PMC5210365; doi:10.1161/jaha.116.004257), 2016-11-17
Supplement: JAH3-5-e004257-s001.pdf [file JAH3-5-e004257-s001.pdf]

# **SUPPLEMENTAL MATERIAL**

**Table S1. Comparison of baseline characteristics of participants with and without visceral fat measurements (page 1 of 2)\***

|                                                       | South Asian        |                    | White               |                     | African American    |                     |
|-------------------------------------------------------|--------------------|--------------------|---------------------|---------------------|---------------------|---------------------|
|                                                       | Without<br>N = 19  | With<br>N = 784    | Without<br>N = 1851 | With<br>N = 771     | Without<br>N = 1488 | With<br>N=405       |
| Age (years)                                           | 57 ± 7             | 57 ± 9             | 63 ± 10             | 63 ± 10             | 62 ± 10             | 62 ± 10             |
| Male sex                                              | 14 (74%)           | 410 (52%)          | 856 (46%)           | 403 (52%)*          | 664 (45%)           | 179 (44%)           |
| Medical history                                       |                    |                    |                     |                     |                     |                     |
| Diabetes                                              | 7 (37%)            | 161 (21%)          | 114 (6%)            | 44 (6%)             | 266 (18%)           | 66 (16%)            |
| Hypertension                                          | 11 (58%)           | 336 (43%)          | 688 (37%)           | 322 (42%)*          | 889 (60%)           | 237 (59%)           |
| Current smoker                                        | 0 (0%)             | 26 (3%)            | 206 (11%)           | 95 (12%)            | 263 (18%)           | 75 (19%)            |
| Alcohol use (≥ 1 drinks/week)                         | 5 (26%)            | 255 (33%)          | 1163 (64%)          | 504 (66%)           | 766 (53%)           | 195 (49%)           |
| Heart disease in 1st-degree relative                  | 4 (21%)            | 369 (47%)*         | 255 (14%)           | 122 (16%)           | 245 (16%)           | 53 (13%)            |
| Cholesterol medication use                            | 5 (26%)            | 237 (30%)          | 320 (17%)           | 140 (18%)           | 260 (17%)           | 52 (13%)*           |
| BMI (kg/m <sup>2</sup> )                              | 28 ± 6             | 26 ± 4*            | 28 ± 5              | 28 ± 5              | 30 ± 6              | 30 ± 5*             |
| LDL-cholesterol (mmol/L)                              | 111 ± 31           | 111 ± 32           | 117 ± 30            | 117 ± 29            | 116 ± 33            | 118 ± 31            |
| Exercise (MET-min/week),<br>interquartile range (IQR) | 750<br>(315, 1470) | 945<br>(315, 1838) | 1800<br>(870, 3360) | 1950<br>(900, 3338) | 1650<br>(630, 3570) | 1680<br>(720, 3570) |
| CAC score                                             |                    |                    |                     |                     |                     |                     |
| Median in those with CAC>0, IQR                       | 166<br>(77, 566)   | 79<br>(24, 270)    | 125<br>(24, 400)    | 104<br>(28, 327)    | 72<br>(21, 259)     | 85<br>(17, 265)     |
| Ordinal category                                      | -                  | -                  | -                   | -                   | -                   | -                   |

|                                                  |          |           |           |           |           |            |
|--------------------------------------------------|----------|-----------|-----------|-----------|-----------|------------|
| CAC=0                                            | 10 (53%) | 431 (55%) | 785 (42%) | 342 (44%) | 823 (55%) | 249 (61%)* |
| CAC 1-100                                        | 4 (21%)  | 189 (24%) | 490 (26%) | 211 (27%) | 377 (25%) | 87 (21%)   |
| CAC>100                                          | 5 (26%)  | 164 (21%) | 576 (31%) | 218 (28%) | 288 (19%) | 69 (17%)   |
| Radiographically detected adiposity              |          |           |           |           |           |            |
| Subcutaneous abdominal (cm <sup>2</sup> )        | 227 ± 72 | 236 ± 95  | N/A       | 253 ± 115 | N/A       | 298 ± 132  |
| Visceral abdominal (cm <sup>2</sup> )            | N/A      | 137 ± 57  | N/A       | 159 ± 75  | N/A       | 128 ± 60   |
| Total intermuscular abdominal (cm <sup>2</sup> ) | 31 ± .   | 22 ± 9    | 44 ± 14   | 28 ± 12   | N/A       | 21 ± 12    |
| Intrahepatic fat (HU of attenuation) #           | 53 ± 9   | 55 ± 11   | 61 ± 12   | 62 ± 13   | 62 ± 12   | 66 ± 10*   |
| Pericardial (cm <sup>3</sup> )                   | 75 ± 41  | 59 ± 29*  | 84 ± 46   | 87 ± 46   | 68 ± 35   | 65 ± 32    |

\* p value<0.05; Overall test for equality/heterogeneity performed for each variable comparing participants with and without visceral fat measurements for each race/ethnic group. An overall test for heterogeneity was also performed using ANOVA or chi-squared tests. Abbreviations: Coronary artery calcium (CAC); body mass index (BMI); metabolic equivalent of task (MET); Hounsfield unit (HU).

**Table S1. Comparison of baseline characteristics of participants with and without visceral fat measurements (page 2 of 2)\***

|                                                       | Hispanic            |                      | Chinese American    |                     | Overall<br>P-value |
|-------------------------------------------------------|---------------------|----------------------|---------------------|---------------------|--------------------|
|                                                       | Without<br>N = 999  | With<br>N = 497      | Without<br>N = 553  | With<br>N = 250     |                    |
| Age (years)                                           | 61 ± 11             | 61 ± 10              | 62 ± 10             | 62 ± 10             | <0.001             |
| Male sex                                              | 471 (47%)           | 250 (50%)            | 258 (47%)           | 132 (53%)           | <0.001             |
| Medical history                                       |                     |                      |                     |                     |                    |
| Diabetes                                              | 186 (19%)           | 78 (16%)             | 79 (14%)            | 26 (10%)            | <0.001             |
| Hypertension                                          | 407 (41%)           | 214 (43%)            | 203 (37%)           | 98 (39%)            | <0.001             |
| Current smoker                                        | 138 (14%)           | 65 (13%)             | 32 (6%)             | 13 (5%)             | <0.001             |
| Alcohol use (≥ 1 drinks/week)                         | 454 (46%)           | 243 (49%)            | 115 (21%)           | 56 (23%)            | <0.001             |
| Heart disease in 1st-degree relative                  | 164 (16%)           | 88 (18%)             | 35 (6%)             | 17 (7%)             | <0.001             |
| Cholesterol medication use                            | 137 (14%)           | 75 (15%)             | 78 (14%)            | 40 (16%)            | <0.001             |
| BMI (kg/m <sup>2</sup> )                              | 29 ± 5              | 29 ± 5               | 24 ± 3              | 24 ± 3              | <0.001             |
| LDL-cholesterol (mmol/L)                              | 1119 ± 33           | 121 ± 32             | 115 ± 29            | 116 ± 28            | <0.001             |
| Exercise (MET-min/week),<br>interquartile range (IQR) | 1125<br>(368, 2700) | 1290<br>(540, 2925)* | 1193<br>(548, 2213) | 1331<br>(630, 2745) | <0.001             |
| CAC score                                             |                     |                      |                     |                     |                    |
| Median in those with CAC>0, IQR                       | 73 (18, 269)        | 70 (19, 247)         | 66 (21, 215)        | 58 (22, 184)        | <0.001             |
| Ordinal category                                      | -                   | -                    | -                   | -                   | <0.001             |
| CAC=0                                                 | 556 (56%)           | 262 (53%)            | 273 (49%)           | 126 (50%)           | N/A                |

|                                                  |           |           |           |          |        |
|--------------------------------------------------|-----------|-----------|-----------|----------|--------|
| CAC 1-100                                        | 256 (26%) | 137 (28%) | 162 (29%) | 74 (30%) | N/A    |
| CAC>100                                          | 187 (19%) | 98 (20%)  | 118 (21%) | 50 (20%) | N/A    |
| Radiographically detected adiposity              |           |           |           |          |        |
| Subcutaneous abdominal (cm <sup>2</sup> )        | N/A       | 264 ± 108 | N/A       | 177 ± 72 | <0.001 |
| Visceral abdominal (cm <sup>2</sup> )            | N/A       | 164 ± 65  | N/A       | 114 ± 49 | <0.001 |
| Total intermuscular abdominal (cm <sup>2</sup> ) | 27 ± .    | 26 ± 12   | 25 ± .    | 19 ± 8   | <0.001 |
| Intrahepatic fat (HU of attenuation) #           | 59 ± 14   | 60 ± 14   | 62 ± 12   | 62 ± 12  | <0.001 |
| Pericardial (cm <sup>3</sup> )                   | 89 ± 44   | 88 ± 43   | 74 ± 32   | 74 ± 30  | <0.001 |

\* p value<0.05; A test for equality/heterogeneity was performed for each variable comparing participants with and without visceral fat measurements for each race/ethnic group. An overall test for heterogeneity was also performed using ANOVA or chi-squared tests. Abbreviations: Coronary artery calcium (CAC); body mass index (BMI); metabolic equivalent of task (MET); Hounsfield unit (HU).
